# Supplementary material
Source: MDPI journal article supplement (https://www.mdpi.com/2073-445X/13/3/280)
Supplement: s1 [file s1]

## Supplementary Materials

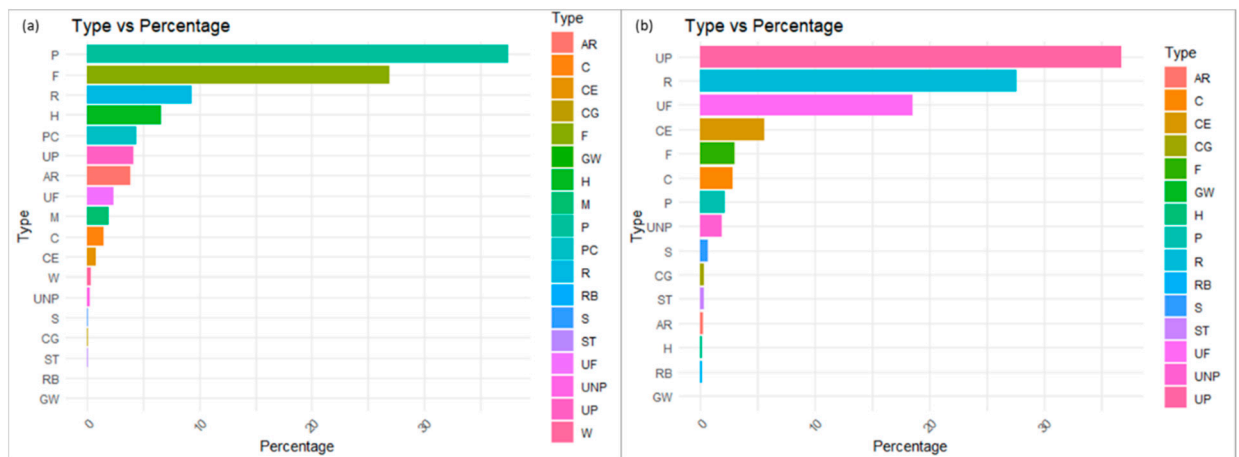

**Figure S1.** (a): Percentage of sum of area of each UGI element at Municipality scale. (b): Percentage of sum of area of each UGI element at City scale. Canal (C), Square (S), Pastures (P), Meander (M), Urban Park (UP), Street trees (ST), River (R), Herbaceous vegetation association (H), Cemetery (CE), Permanent crop (PC), Forest (F), Community garden (CG), Roundabout (RB), Arable land (AR), Urban forest (UF), Urban natural Park (UNP), Green Wall (GW), Wetland (W).

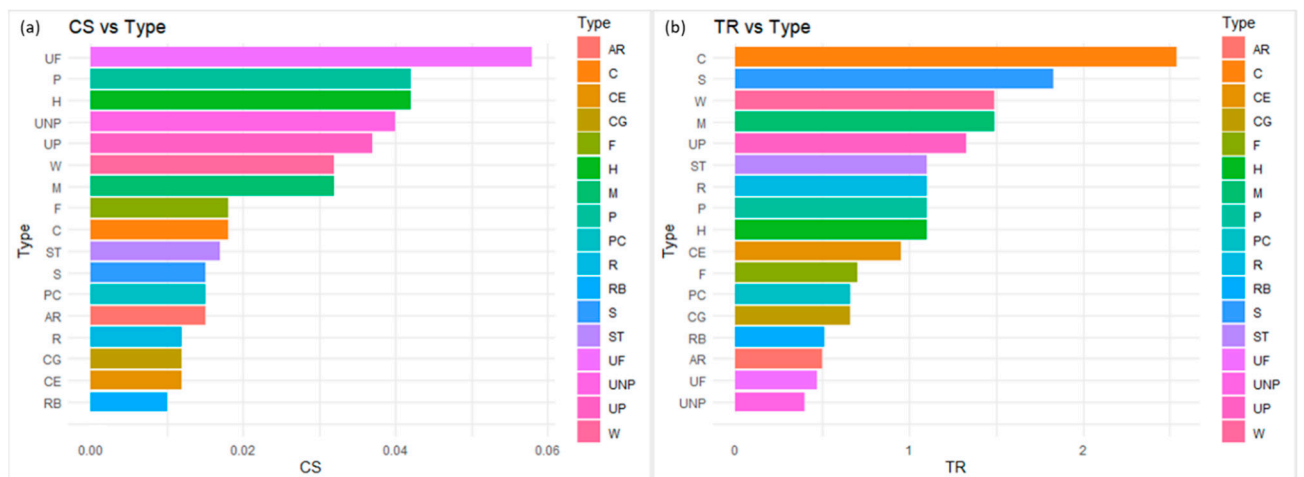

**Figure S2.** (a): Carbon Sequestration (CS) of each UGI element. (b): Temperature (TR) of each type of UGI site. Canal (C), Square (S), Pastures (P), Meander (M), Urban Park (UP), Street trees (ST), River (R), Herbaceous vegetation association (H), Cemetery (CE), Permanent crop (PC), Forest (F), Community garden (CG), Roundabout (RB), Arable land (AR), Urban forest (UF), Urban natural Park (UNP), Wetland (W).

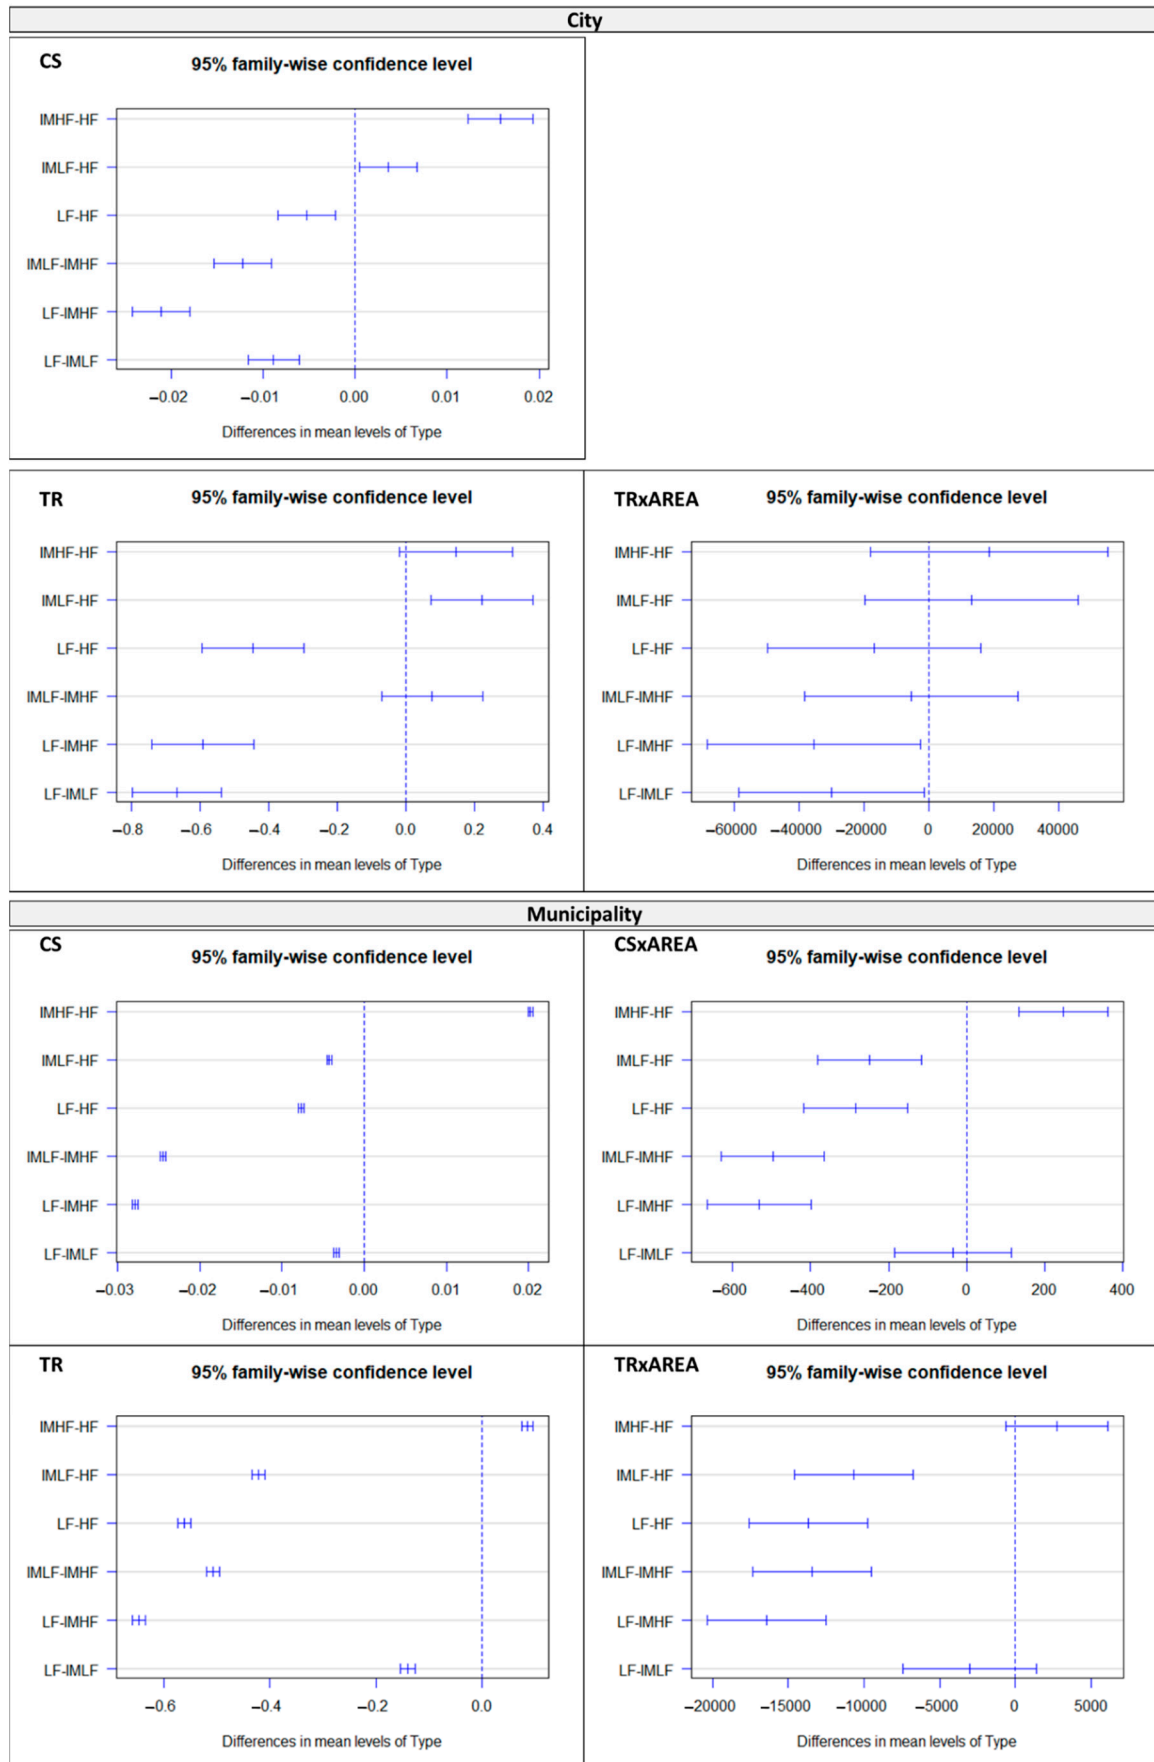

**Figure S3.** Post-hoc test showing the means and the difference in means levels of different types of scenarios, for Carbon Sequestration (CS), CS x Area, and Temperature Regulation (TR), TR x Area for

Municipality scale and for City scale. LF (current situation of sites with low value of functioning), HF (current situation of sites with high value of functioning), IMLF (Improvement of sites with low value of functioning), IMHF (Improvement of sites with high value of functioning).

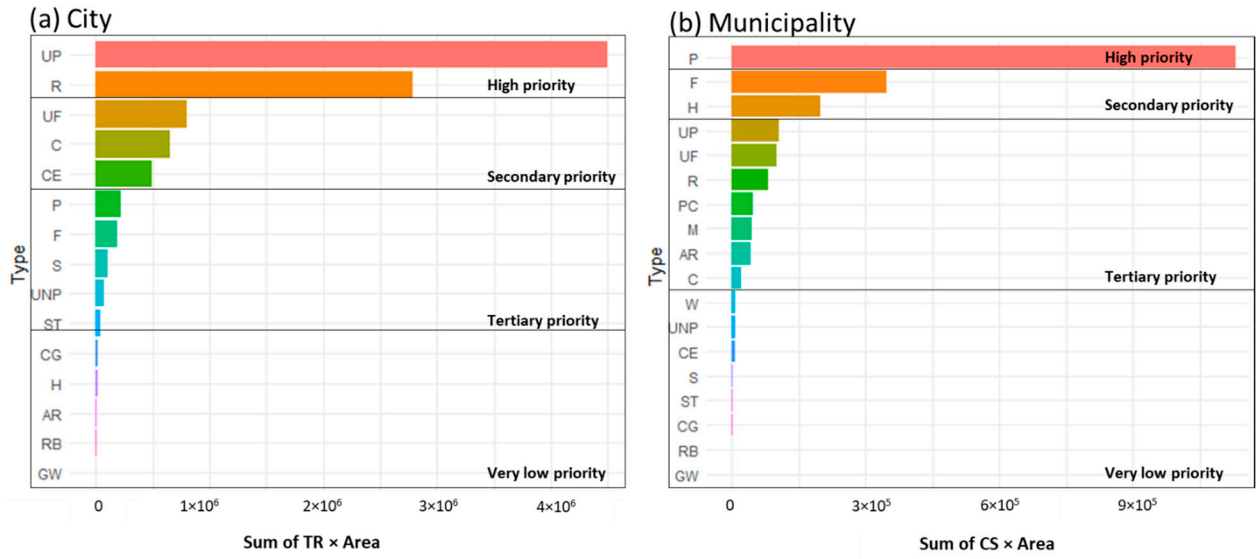

**Figure S4.** (a): Priority analysis of restoration for Temperature Regulation (TR) by area in the city, Sum of TR × Area (°Celsius). (b): Priority analysis of restoration for Carbon Sequestration (CS) by area in the Municipality. Sum of CS × Area (g). Canal (C), Square (S), Pastures (P), Meander (M), Urban Park (UP), Street trees (ST), River (R), Herbaceous vegetation association (H), Cemetery (CE), Permanent crop (PC), Forest (F), Community garden (CG), Roundabout (RB), Arable land (AR), Urban forest (UF), Urban natural Park (UNP), Green Wall (GW), Wetland (W).

City scale

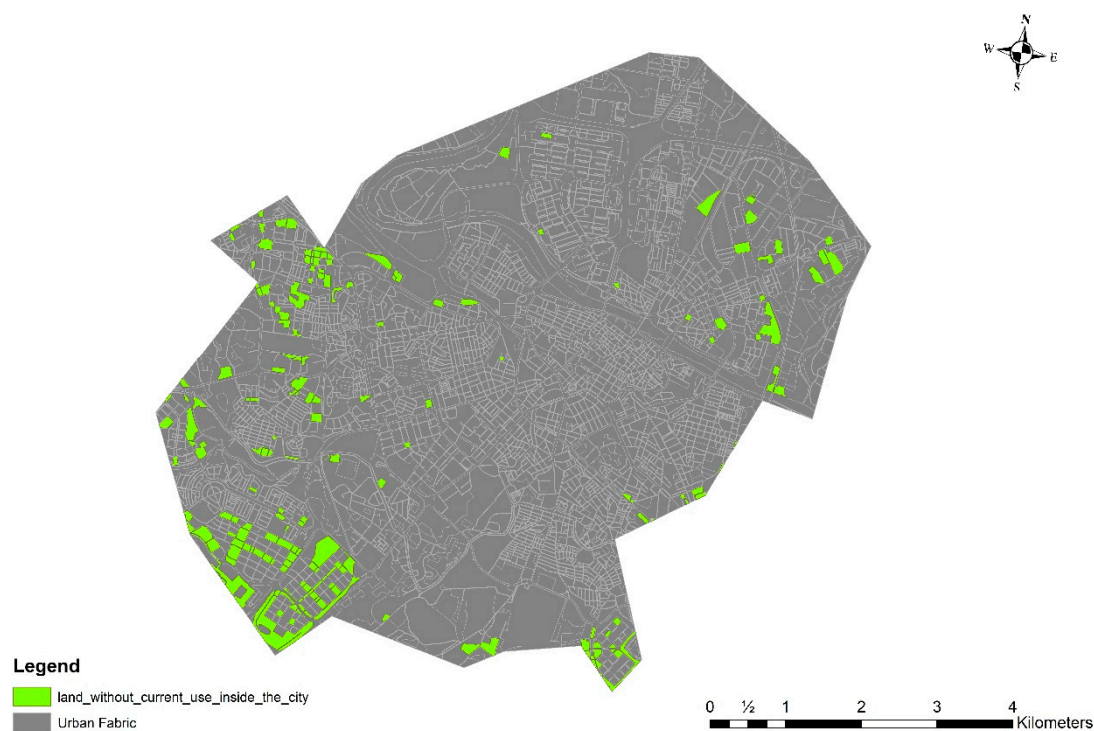

**Figure S5.** Map of land without current use in city, where new urban green infrastructure sites could be designed by the municipality of Zaragoza to increase carbon storage in city.

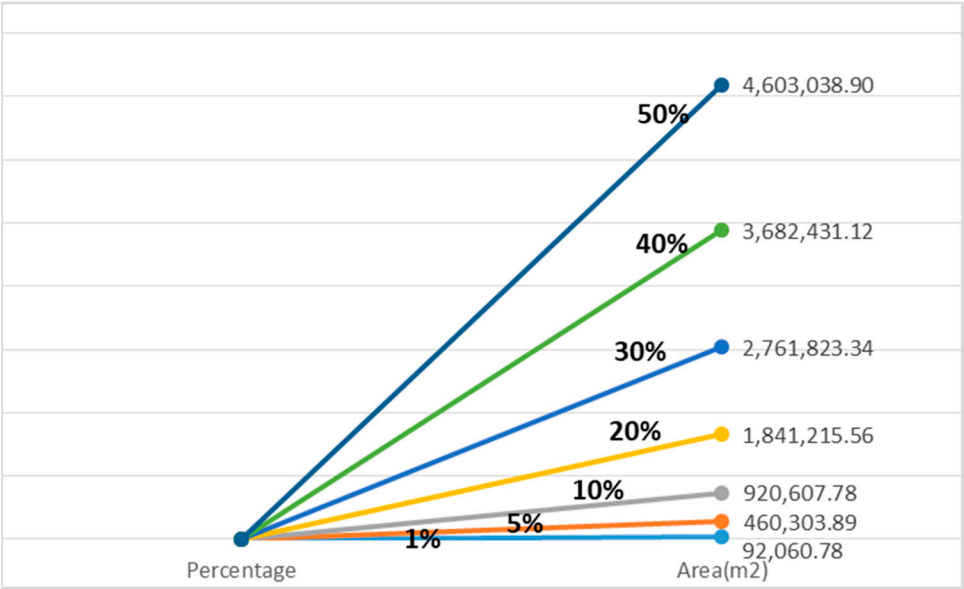

**Figure S6.** Graph showing the area needed to improve carbon sequestration delivered by UGI in cities by 1%, 5%, 10%, 20%, 30%, 40% and 50%
